# Supplementary material
Source: publisher figshare collection journal article supplement (https://gsajournals.figshare.com/ndownloader/files/23777594)
Supplement: Supplementary file 1 [file 23777594]

## Sheet: linGen_com_DP10_mutation
Table S9. Single nucleotide mutations in the 35 MA lines. Mutations within coding sequences (CDS) were analyzed for their effect on amino acid changes in the protein using the SIFT tool.
Chromosome	Position	Mutation	Line	Region	Gene ID	Gene name	Variant type	A.A change		Line	No of mutations	Mutation rate		Line	Total mutations	Avg. mutation rate	SE
chrVII	299358	GG > GT	RR_1	CDS	YGL112C	TAF6	Non-synonymous	P124Q		RR_1	1	0.20 x 10^-10		RR	13	0.54 x 10^-10	0.21 x 10^-10
chrVII	256979	TT > TC	RR_2	Non-coding						RR_2	5	1.04 x 10^-10		S/R	8	0.17 x 10^-10	0.08 x 10^-10
chrX	155134	CC > CT	RR_2	CDS	YJL137C	GLG2	Non-synonymous	V332I		RR_3	7	1.46 x 10^-10		SS	26	1.35 x 10^-10	0.06 x 10^-10
chrX	564786	CC > CT	RR_2	CDS	YJR066W	TOR1	Non-synonymous	R1791W		RR_4	0	0		S/Y	47	0.98 x 10^-10	0.12 x 10^-10
chrXVI	262264	AA > AG	RR_2	CDS	YPL153C	RAD53	Synonymous	G643G		RR_5	0	0		YY	28	1.16 x 10^-10	0.25 x 10^-10
chrXVI	751613	GG > GT	RR_2	CDS	YPR112C	MRD1	Non-synonymous	P103T		S/R_1	0	0		Total	122
chrII	350232	GG > GA	RR_3	Non-coding						S/R_2	0	0
chrIV	142002	TT > TC	RR_3	Non-coding						S/R_3	0	0
chrIV	244143	GG > GA	RR_3	CDS	YDL122W	UBP1	Non-synonymous	S531N		S/R_4	3	0.62 x 10^-10
chrVI	24346	CC > CA	RR_3	CDS	YFL053W	DAK2	Non-synonymous	F308L		S/R_5	1	0.21 x 10^-10
chrXIII	43326	GG > GA	RR_3	CDS	YML114C	TAF8	Non-synonymous	L84F		S/R_6	0	0
chrXIII	780646	CC > CA	RR_3	CDS	YMR257C	PET111	Non-synonymous	M462I		S/R_7	2	0.42 x 10^-10
chrXV	457512	TT > TC	RR_3	CDS	YOR070C	GYP1	Synonymous	A103A		S/R_8	2	0.42 x 10^-10
chrIV	302875	CC > CA	S/R_4	Non-coding						S/R_9	0	0
chrVIII	367732	CC > CA	S/R_4	CDS	YHR131C	NA	Non-synonymous	R54L		S/R_10	0	0
chrXV	1019241	AA > AT	S/R_4	Non-coding						SS_1	6	1.25 x 10^-10
chrVII	3460	TT > TC	S/R_5	CDS	YGL263W	COS12	Non-synonymous	L224P		SS_2	6	1.25 x 10^-10
chrVII	845303	CC > CA	S/R_7	Non-coding						SS_3	7	1.46 x 10^-10
chrX	106589	TT > TC	S/R_7	CDS	YJL166W	QCR8	Synonymous	F52F		SS_4	7	1.46 x 10^-11
chrIX	91754	CC > CT	S/R_8	CDS	YIL137C	TMA108	Synonymous	S345S		S/Y_1	7	1.46 x 10^-12
chrXIV	312237	CC > CT	S/R_8	CDS	YNL172W	APC1	Synonymous	F534F		S/Y_2	6	1.25 x 10^-10
chrIV	662692	GG > GC	S/Y_1	CDS	YDR104C	SPO71	Non-synonymous	A740G		S/Y_3	4	0.83 x 10^-10
chrIV	821636	GG > GA	S/Y_1	CDS	YDR180W	SCC2	Synonymous	A114A		S/Y_4	2	0.42 x 10^-10
chrVII	269895	CC > CT	S/Y_1	CDS	YGL128C	CWC23	Non-synonymous	D84N		S/Y_5	4	0.83 x 10^-10
chrVIII	319006	GG > GT	S/Y_1	CDS	YHR102W	KIC1	Non-synonymous	G812V		S/Y_6	7	1.46 x 10^-10
chrXI	439724	TT > TC	S/Y_1	Non-coding						S/Y_7	7	1.46 x 10^-10
chrXII	357240	GG > GT	S/Y_1	CDS	YLR106C	MDN1	Non-synonymous	H2167N		S/Y_8	3	0.62 x 10^-10
chrXV	586315	TT > TC	S/Y_1	CDS	YOR138C	RUP1	Non-synonymous	N4D		S/Y_9	3	0.62 x 10^-10
chrIV	176201	GG > GA	S/Y_10	CDS	YDL156W	NA	Synonymous	K428K		S/Y_10	4	0.83 x 10^-10
chrX	467113	AA > AG	S/Y_10	CDS	YJR018W	NA	Non-synonymous	R110G		YY_1	2	0.42 x 10^-10
chrXII	92608	CC > CA	S/Y_10	Non-coding						YY_2	4	0.83x 10^-10
chrXV	56068	GG > GT	S/Y_10	CDS	YOL142W	RRP40	Non-synonymous	D171Y		YY_3	7	1.46 x 10^-10
chrIX	228813	CC > CA	S/Y_2	CDS	YIL071C	PCI8	Non-synonymous	L394F		YY_4	9	1.87 x 10^-10
chrVIII	272171	GG > GA	S/Y_2	Non-coding						YY_5	6	1.25 x 10^-10
chrX	697570	GG > GT	S/Y_2	CDS	YJR142W	NA	Stop codon	E144 to stop codon
chrXIV	294053	GG > GT	S/Y_2	CDS	YNL183C	NPR1	Non-synonymous	T486K
chrXV	102113	GG > GT	S/Y_2	CDS	YOL115W	PAP2	Non-synonymous	Q213H
chrXV	417394	TT > TG	S/Y_2	CDS	YOR047C	STD1	Non-synonymous	K96N
chrXII	132046	GG > GT	S/Y_3	CDS	YLL008W	DRS1	Non-synonymous	K106N
chrXII	896973	CC > CA	S/Y_3	CDS	YLR387C	REH1	Non-synonymous	V234F
chrXIII	581899	GG > GC	S/Y_3	CDS	YMR162C	DNF3	Non-synonymous	R675G
chrXIV	264216	GG > GT	S/Y_3	CDS	YNL200C	NA	Non-synonymous	H80N
chrXII	232599	GG > GA	S/Y_4	CDS	YLR044C	PDC1	Non-synonymous	H495Y
chrXVI	637769	GG > GT	S/Y_4	CDS	YPR033C	HTS1	Synonymous	S417S
chrII	686987	TT > TG	S/Y_5	CDS	YBR235W	NA	Synonymous	S29S
chrIV	104215	CC > CA	S/Y_5	CDS	YDL198C	GGC1	Non-synonymous	G113C
chrXV	512859	TT > TC	S/Y_5	CDS	YOR099W	KTR1	Synonymous	C345C
chrXV	957924	AA > AG	S/Y_5	CDS	YOR338W	NA	Non-synonymous	R343G
chrIV	485180	TT > TC	S/Y_6	CDS	YDR019C	GCV1	Synonymous	L62L
chrIV	1031695	AA > AC	S/Y_6	Non-coding
chrIX	321790	AA > AG	S/Y_6	CDS	YIL016W	SNL1	Non-synonymous	M113V
chrXIII	525203	AA > AG	S/Y_6	CDS	YMR128W	ECM16	Non-synonymous	H503R
chrXIII	629856	GG > GA	S/Y_6	CDS	YMR185W	NA	Non-synonymous	E278K
chrXIII	899120	GG > GA	S/Y_6	CDS	YMR312W	ELP6	Non-synonymous	C239Y
chrXVI	133062	TT > TC	S/Y_6	CDS	YPL221W	FLC1	Non-synonymous	L7P
chrIV	445288	CC > CG	S/Y_7	CDS	YDL003W	MCD1	Non-synonymous	I202M
chrIV	445304	AA > AC	S/Y_7	CDS	YDL003W	MCD1	Non-synonymous	T208P
chrVIII	362336	CC > CT	S/Y_7	CDS	YHR128W	FUR1	Synonymous	F74F
chrXIV	737477	CC > CT	S/Y_7	CDS	YNR059W	MNT4	Synonymous	S225S
chrXV	675864	GG > GA	S/Y_7	Non-coding
chrXV	742566	CC > CT	S/Y_7	Non-coding
chrXV	798608	CC > CT	S/Y_7	Non-coding
chrVII	315020	TT > TA	S/Y_8	CDS	YGL099W	LSG1	Synonymous	L130L
chrXII	631252	CC > CA	S/Y_8	CDS	YLR247C	IRC20	Non-synonymous	W701C
chrXIII	487534	GG > GT	S/Y_8	CDS	YMR109W	MYO5	Synonymous	A316A
chrIV	272489	AA > AG	S/Y_9	CDS	YDL105W	NSE4	Non-synonymous	E34G
chrXV	761929	GG > GT	S/Y_9	CDS	YOR226C	ISU2	Synonymous	G52G
chrXVI	703527	TT > TC	S/Y_9	CDS	YPR081C	GRS2	Synonymous	E148E
chrIV	449997	TT > TC	SS_1	Non-coding
chrIX	32159	GG > GT	SS_1	CDS	YIL166C	NA	Synonymous	G136G
chrXI	250576	CC > CT	SS_1	CDS	YKL101W	HSL1	Stop codon	Q553 to stop codon
chrXV	107774	GG > GA	SS_1	CDS	YOL112W	MSB4	Synonymous	T355T
chrXV	478717	GG > GT	SS_1	CDS	YOR081C	TGL5	Non-synonymous	H158N
chrXVI	239769	TT > TA	SS_1	CDS	YPL164C	MLH3	Stop codon	K577 to stop codon
chrII	274620	GG > GT	SS_2	CDS	YBR018C	GAL7	Non-synonymous	A303E
chrIII	58311	TT > TC	SS_2	CDS	YCL037C	SRO9	Non-synonymous	N123S
chrIV	631991	CC > CA	SS_2	CDS	YDR093W	DNF2	Non-synonymous	T237K
chrVI	237745	GG > GT	SS_2	CDS	YFR041C	ERJ5	Non-synonymous	Q171K
chrVII	239925	GG > GT	SS_2	CDS	YGL141W	HUL5	Non-synonymous	A525S
chrXIV	290713	TT > TC	SS_2	CDS	YNL186W	UBP10	Synonymous	S406P
chrIV	1479642	AA > AT	SS_3	CDS	YDR518W	EUG1	Non-synonymous	R345S
chrIX	80455	GG > GT	SS_3	Non-coding
chrV	18839	CC > CT	SS_3	Non-coding
chrX	92379	GG > GA	SS_3	CDS	YJL176C	SWI3	Stop codon	Q718 to stop codon
chrXI	69081	CC > CA	SS_3	CDS	YKL198C	PTK1	Synonymous	P380P
chrXI	448108	CC > CG	SS_3	Non-coding
chrXV	605764	GG > GT	SS_3	CDS	YOR145C	PNO1	Synonymous	S136S
chrVII	807641	TT > TC	SS_4	CDS	YGR160W	NA	Non-synonymous	L190S
chrVIII	199667	GG > GA	SS_4	CDS	YHR047C	AAP1	Synonymous	S548S
chrX	296823	CC > CT	SS_4	CDS	YJL076W	NET1	Stop codon	Q527 to stop codon
chrXI	422803	TT > TG	SS_4	CDS	YKL010C	UFD4	Synonymous	R1025R
chrXIII	117057	TT > TG	SS_4	CDS	YML075C	HMG1	Non-synonymous	K614N
chrXIII	321683	CC > CA	SS_4	Non-coding
chrXIV	499623	CC > CA	SS_4	Non-coding
chrVII	449696	AA > AC	YY_1	CDS	YGL025C	PGD1	Non-synonymous	L88V
chrXV	722233	CC > CG	YY_1	CDS	YOR202W	HIS3	Non-synonymous	C96W
chrIV	400403	CC > CG	YY_2	CDS	YDL029W	ARP2	Non-synonymous	S314W
chrIX	160518	TT > TC	YY_2	Non-coding
chrVIII	477175	GG > GT	YY_2	CDS	YHR186C	KOG1	Synonymous	G1166G
chrXVI	860368	GG > GT	YY_2	CDS	YPR159C-A	NA	Stop codon	Y16 to stop codon
chrIV	286417	CC > CT	YY_3	CDS	YDL097C	RPN6	Synonymous	T93T
chrV	514296	CC > CA	YY_3	CDS	YER166W	DNF1	Non-synonymous	A518E
chrVII	944982	GG > GA	YY_3	Non-coding
chrX	518032	GG > GT	YY_3	Non-coding
chrXIII	882140	AA > AG	YY_3	CDS	YMR306W	FKS3	Non-synonymous	K328E
chrXV	455808	CC > CT	YY_3	Non-coding
chrXVI	556481	CC > CA	YY_3	CDS	YPR001W	CIT3	Non-synonymous	N35K
chrIII	140667	GG > GT	YY_4	CDS	YCR014C	POL4	Synonymous	G89G
chrIV	661095	TT > TC	YY_4	CDS	YDR103W	STE5	Non-synonymous	Y916H
chrVII	259650	TT > TA	YY_4	CDS	YGL133W	ITC1	Synonymous	S648S
chrVII	346433	AA > AG	YY_4	CDS	YGL087C	MMS2	Synonymous	R129R
chrVII	904921	GG > GA	YY_4	Non-coding
chrVIII	228554	CC > CA	YY_4	CDS	YHR065C	RRP3	Non-synonymous	A162S
chrX	379556	CC > CT	YY_4	CDS	YJL036W	SNX4	Synonymous	N244N
chrXV	294977	CC > CA	YY_4	CDS	YOL016C	CMK2	Non-synonymous	D382Y
chrXV	484441	AA > AG	YY_4	CDS	YOR086C	TCB1	Non-synonymous	I780T
chrI	171619	CC > CA	YY_5	CDS	YAR018C	KIN3	Stop codon	E29 to stop codon
chrIII	77466	CC > CA	YY_5	CDS	YCL025C	AGP1	Non-synonymous	A152S
chrXV	29606	CC > CG	YY_5	CDS	YOL155C	HPF1	Synonymous	V663V
chrXV	29618	CC > CT	YY_5	CDS	YOL155C	HPF1	Synonymous	T667T
chrXV	500743	TT > TA	YY_5	CDS	YOR093C	NA	Synonymous	I570I
chrXVI	55685	AA > AC	YY_5	Non-coding
